# Supplementary material for: One-pot compositional and structural regeneration of degraded LiCoO2 for directly reusing it as a high-performance lithium-ion battery cathode
Source: Royal Society of Chemistry journal article supplement (doi:10.1039/d0gc02662j), 2020-01-01
Supplement: d0gc02662j1.pdf [file d0gc02662j1.pdf]

## Supporting information

### One-pot compositional and structural regeneration of degraded $\text{LiCoO}_2$ for directly reusing as a high-performance lithium-ion battery cathode

Juan Yang<sup>a</sup>, Wenyu Wang<sup>a</sup>, Huimeng Yang<sup>a</sup> and Dihua Wang<sup>\*a</sup>

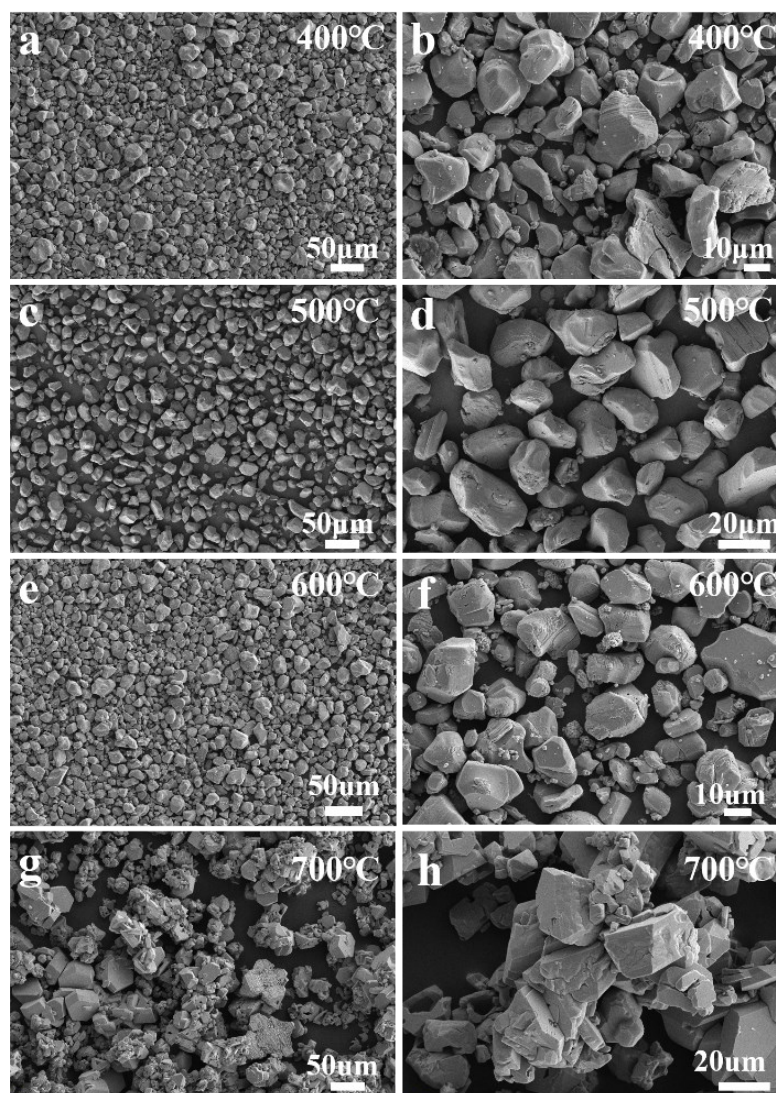

**Fig. S1** SEM images of  $\text{LiCoO}_2$  regenerated in  $\text{LiOH-KOH-Li}_2\text{CO}_3$  molten salt at 400 °C (a-b), 500 °C (c-d), 600 °C (e-f) and 700 °C (g-h), respectively.

<sup>a</sup> School of Resource and Environmental Science, International Cooperation Base for Sustainable Utilization of Resources and Energy in Hubei Province, Wuhan University, Wuhan 430072, China. E-mail: wangdh@whu.edu.cn

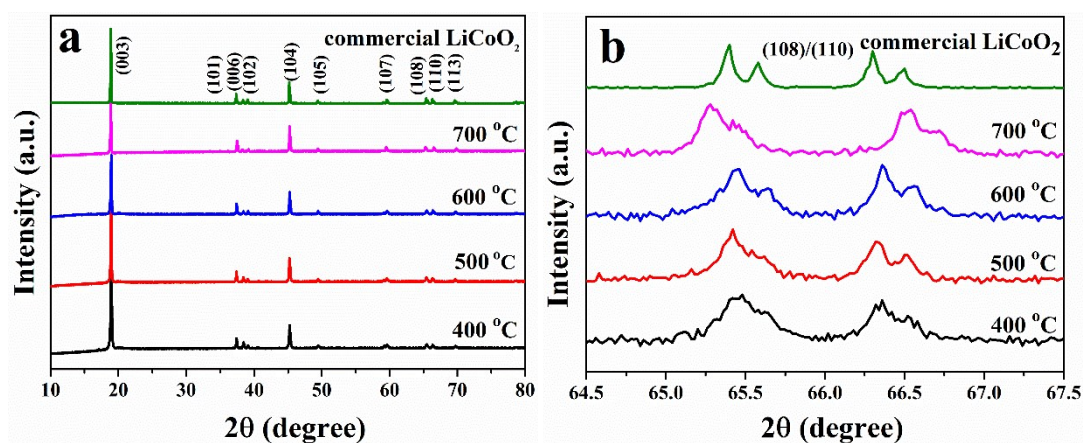

**Fig. S2** (a) the XRD patterns of commercial  $\text{LiCoO}_2$  and regenerated  $\text{LiCoO}_2$  prepared at various temperatures; (b) The enlarged view of all (108)/(110) reflections in (a).

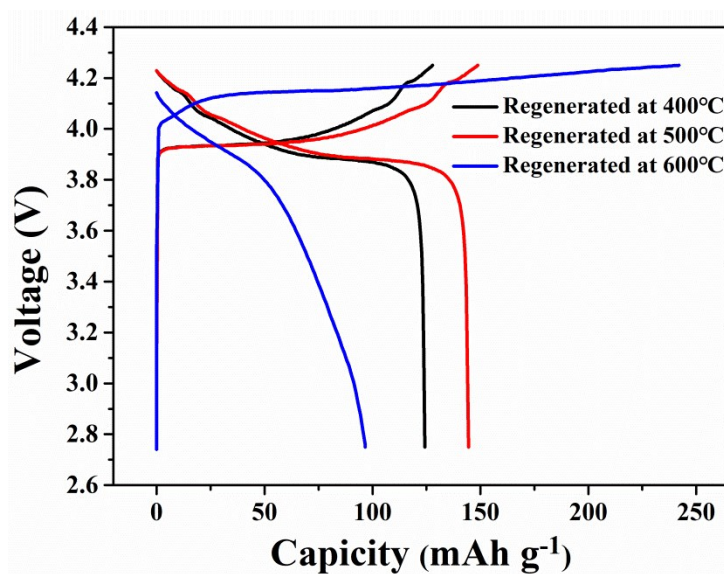

**Fig. S3** Voltage–capacity profiles of different regenerated  $\text{LiCoO}_2$  materials at 0.2 C.

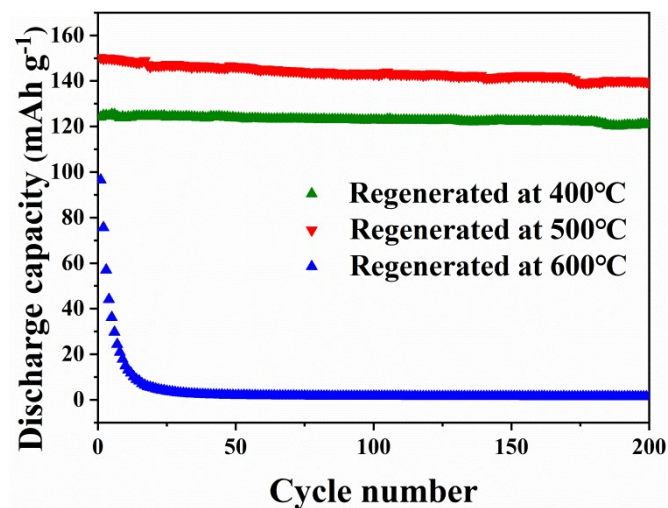

**Fig. S4** Cycling performance of different regenerated LiCoO<sub>2</sub> materials at 0.2 C.

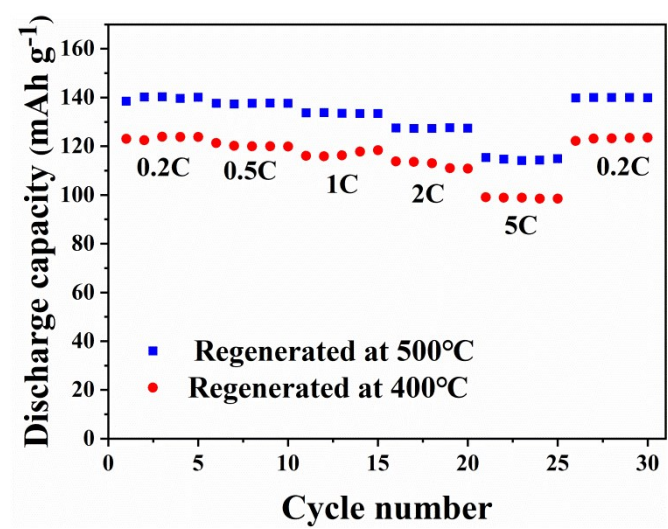

**Fig. S5** Discharge specific capacity performance of different regenerated LiCoO<sub>2</sub> materials at different rate.
